# Supplementary material
Source: PubMed Central journal article supplement (PMC10130165)
Supplement: 41467_2023_37840_MOESM1_ESM.pdf [file 41467_2023_37840_MOESM1_ESM.pdf]

| Antibody                                                                                   | Supplier                  | Catalog # | Lot        | Clone          | Species | Application/Dilution |                |               |
|--------------------------------------------------------------------------------------------|---------------------------|-----------|------------|----------------|---------|----------------------|----------------|---------------|
|                                                                                            |                           |           |            |                |         | IF/ICC Dilution      | Traditional WB | CE Immunblots |
| β-Actin                                                                                    | Cell Signaling Technology | 4970S     | 15         | 13E5           | Rabbit  |                      | 1:1000         | 1:200         |
| CD31                                                                                       | BD Biosciences            | 553370    | 2146504    | MEC 13.3       | Mouse   | 1:500                |                |               |
| eNOS                                                                                       | R&D                       | AF950     | BBu0417051 |                | Goat    | 1:500                |                |               |
| phospho-eNOS (S1176/1177)                                                                  | BD Biosciences            | 612392    | 9044662    | 19/eNOS/S1177  | mouse   |                      |                | 1:50          |
| phospho-eNOS (T495)                                                                        | BD Biosciences            | 612706    | 5329915    | 31/eNOS(pT495) | Mouse   |                      |                | 1:50          |
| eNOS                                                                                       | Millipore                 | 07-520    | 2708538    |                | Rabbit  |                      |                | 1:75          |
| Fibrinogen                                                                                 | Dako Agilent              | A0080     | 15063      |                | Rabbit  | 1:750                |                |               |
| GAPDH                                                                                      | Thermo Fisher Scientific  | PA1-987   | UG28627    |                | Rabbit  |                      | 1:1000         |               |
| Tau5                                                                                       | Millipore                 | MAB361    | 3275077    | Tau-5          | Mouse   | 1:500                | 1:500          | 1:50          |
| phospho-Tau (T231)                                                                         | Thermo Scientific,        | MN1040    | PF202799   | AT180          | Mouse   |                      |                | 1:50          |
| phospho-Tau AT8                                                                            | Thermo Fisher Scientific  | MN1020    | VE2953712  | AT8            | Mouse   | 1:500                |                |               |
| T22 (Oligomeric tau)                                                                       | Dr. Rakez Kayed Lab       |           |            |                | Rabbit  | 1:500                |                |               |
| α-tubulin                                                                                  | Cell Signaling Technology | 2144S     | 6          |                | Rabbit  |                      |                | 1:1000        |
| Acetyl-α-Tubulin                                                                           | Santa Cruz Biotechnology  | sc-23950  | F1516      | 6-11B-1        | Mouse   | 1:500                |                | 1:2000        |
| β-tubulin                                                                                  | Sigma Aldrich             | T4026     | 107M4801V  | TUB2.1         | Mouse   | 1:1000               |                |               |
| α/β tubulin                                                                                | Cell Signaling Technology | 2148S     | 8          |                | Rabbit  | 1:1000               |                |               |
| V5 antibody                                                                                | Thermo Fisher Scientific  | R960-25   | 2024280    | P/N 46-0705    | Mouse   | 1:500                |                |               |
| Goat anti-Rabbit IgG (H+L) Cross-Adsorbed Secondary Antibody, Alexa Fluor™ 594             | Invitrogen                | A11012    | 1933366    |                | Goat    | 1:500                |                |               |
| Goat anti-Mouse IgG (H+L) Highly Cross-Adsorbed Secondary Antibody, Alexa Fluor™ 488       | Invitrogen                | A11029    | 2120125    |                | Goat    | 1:500                |                |               |
| Goat anti-Mouse IgG (H+L) Highly Cross-Adsorbed Secondary Antibody, Alexa Fluor™ 647       | Invitrogen                | A21236    | 1229707    |                | Goat    | 1:500                |                |               |
| Donkey anti-Goat IgG (H+L) Highly Cross-Adsorbed Secondary Antibody, Alexa Fluor™ Plus 488 | Invitrogen                | A32814    | UI289709   |                | Donkey  | 1:500                |                |               |

**Supplementary Table 1. Antibody Information.** Supplier, catalog number, lot number, clone, and dilution information for antibodies used in immunofluorescence (IF), immunocytochemistry (ICC), tradition Western blot (WB), and capillary electrophoresis (CE) experiments.

| Species | Gene Transcript | 5' → 3'                |                            |
|---------|-----------------|------------------------|----------------------------|
|         |                 | Forward                | Reverse                    |
| Human   | Tau             | CCTCTCCCGTCCTCGCCTCTG  | GGGTCAGCCATCCTGGTTCA       |
| Human   | Cdkn2a          | ACTTCAGGGGTGCCACATTC   | CGACCCTGTCCCTCAAATCC       |
| Human   | Cdkn1a          | AGTCAGTTCCTTGTGGAGCC   | CATTAGCGCATCACAGTCGC       |
| Human   | Tp53            | CCTGGATTGGCCAGACTGC    | TTTTTCAGGAAGTAGTTTCCATAGGT |
| Human   | IL-6            | TGAACTCCTTCTCCACAAGCG  | GAGATGCCGTCGAGGATGTA       |
| Human   | IL-1 $\beta$    | CAGAAGTACCTGAGCTCGCC   | AGATTCGTAGCTGGATGCCG       |
| Human   | TNF $\alpha$    | CACAGTGAAGTGCTGGCAAC   | AGGAAGGCCTAAGGTCCACT       |
| Human   | PAI-1           | CCTCAGGAAGCCCCTAGAGA   | ATGCGGGCTGAGACTATGAC       |
| Human   | MCP-1           | TTCCCCTAGCTTTCCCCAGA   | TCCCAGGGGTAGAACTGTGG       |
| Human   | GAPDH           | GGTGAATAACCCTGCGCTC    | CAGAGTTAAAAGCAGCCCTGG      |
| Mouse   | Cdkn2a          | CGAACTCGAGGAGAGCCATC   | GGAGAAGGTAGTGGGGTCCT       |
| Mouse   | Cdkn1a          | GTGGGTCTGACTCCAGCCCC   | CCTTCTCGTGAGACGCTTAC       |
| Mouse   | Tp53            | CACAGCGTGGTGGTACCTTA   | TCTTCTGTACGGCGGTCTCT       |
| Mouse   | IL-6            | CCGGAGAGGAGACTTCACAG   | TCCACGATTTCCAGAGAAC        |
| Mouse   | IL-1 $\beta$    | GAGCACAAGCCTGTCTTCCT   | GGCCGAGGACTAAGGAGTCT       |
| Mouse   | TNF $\alpha$    | CGGGCAGGTCTACTTTGGAG   | ACCCTGAGCCATAATCCCCT       |
| Mouse   | PAI-1           | GACACCCTCAGCATGTTTCATC | AGGGTTGCACTAAACATGTCAG     |
| Mouse   | MCP-1           | GCTCAGCCAGATGCAGTTAA   | TCTTGAGCTTGGTGACAAAACT     |
| Mouse   | GAPDH           | ACCAACTGCTTAGCCCCC     | TGCAGGGATGATGTTCTGGG       |

Supplementary Table 2. qRT-PCR Primer Sequences

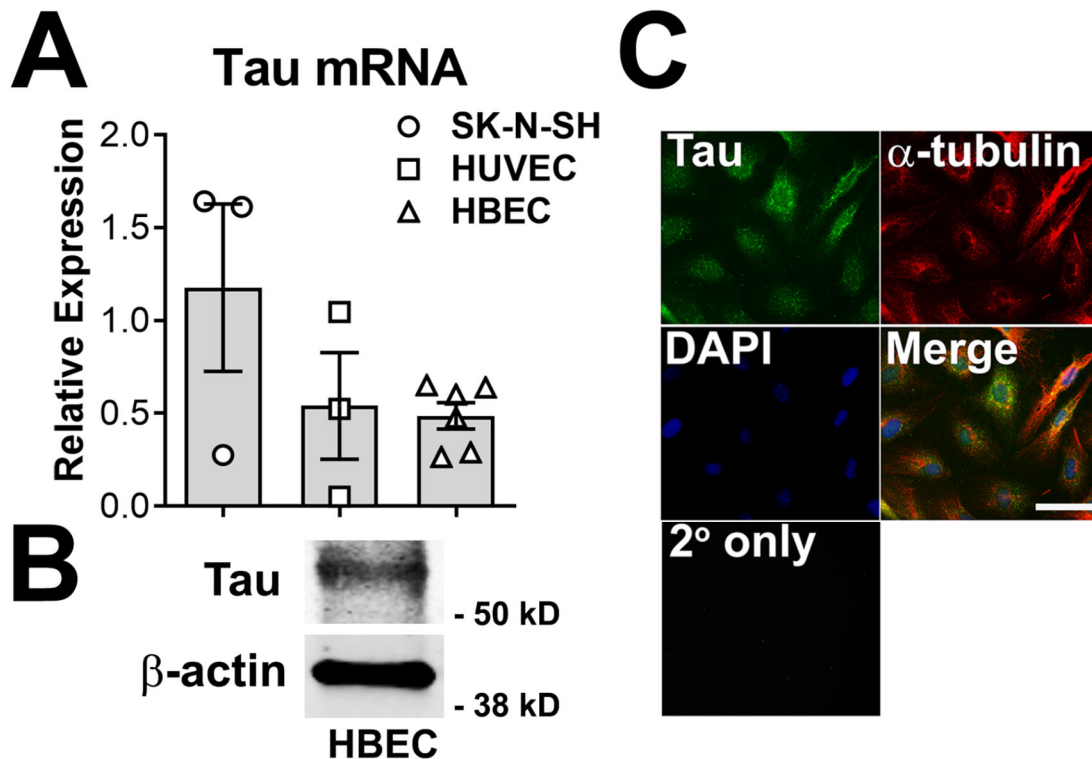

**Supplementary Figure 1. Tau is expressed in primary human brain microvascular endothelial cells and localizes in close proximity to microtubules. (A)** Quantitative real-time PCR measurements of tau mRNA abundance in human SK-N-SH neuroblastoma cells, human brain microvascular endothelial cells (HBEC), and primary human umbilical vein endothelial cells (HUVEC) show comparable expression of tau in cells of endothelial and neuronal origin ( $F(2, 9) = 2.467$ , ANOVA,  $p=0.14$ . SK-N-SH,  $n=3$ ; HUVEC,  $n=3$ ; HBEC,  $n=6$  biologically independent samples examined in 1 independent experiment for SK-N-SH and HUVEC, 3 independent experiments for HBEC). Data are means  $\pm$  SEM. **(B)** Western blot showing tau protein content in HBEC with  $\beta$ -actin as reference,  $n=1$  biologically independent sample examined in 1 independent experiment. **(C)** Tau immunoreactivity in HBEC (Tau5, green) is found in close proximity to tubulin ( $\alpha/\beta$ -tubulin, red). Scale bar is 50  $\mu$ m.

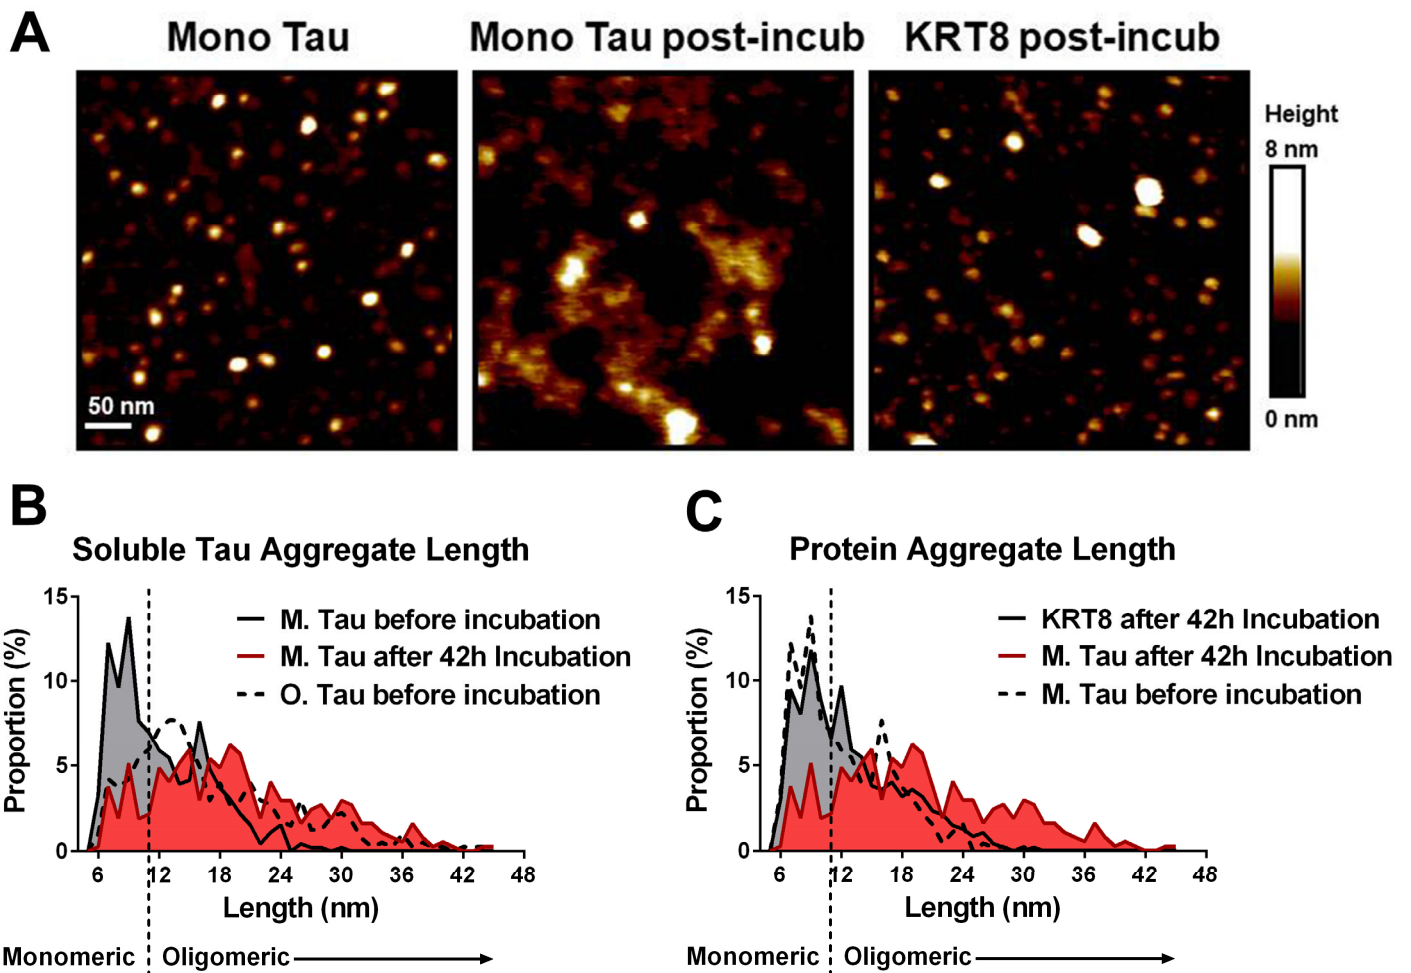

**Supplementary Figure 2. Tau monomers spontaneously oligomerize during incubation with cultures of human brain microvascular endothelial cells (HBEC).** **A**, Representative AFM images of field fragments with monomeric tau, monomeric tau post-incubation with HBEC, and human cyokeratin-8 (KRT8) post-incubation with HBEC. **B**, Length profiles (nm) of tau species measured by atomic force microscopy in media from HBEC cultures treated with tau monomers (M. Tau) before and after 42 h of incubation (M. Tau before incubation, n=458 particles measured; M. Tau after incubation, n=370 particles measured). Length profiles of tau species in media with tau oligomers (O. Tau) are provided as reference (O. Tau, n=403, Figure 1F). **C**, Length profiles (nm) of human cyokeratin-8 (KRT8, gray) and monomeric tau (M. Tau, red) measured by atomic force microscopy. Monomeric tau was measured in media before and after, and KRT8 was measured in media after 42 hours of incubation with HBEC (M. Tau before incubation, n=458 particles measured (also in Figure S1B); M. Tau after incubation, n=370 particles measured (also in Figure S1B); KRT8 after incubation, n=474). Length profiles of tau in media spiked with tau monomer preparations (M. Tau, dashed line) are

provided as reference. Particles measured were examined over 1 independent experiment. Data are representative images and frequency profiles.

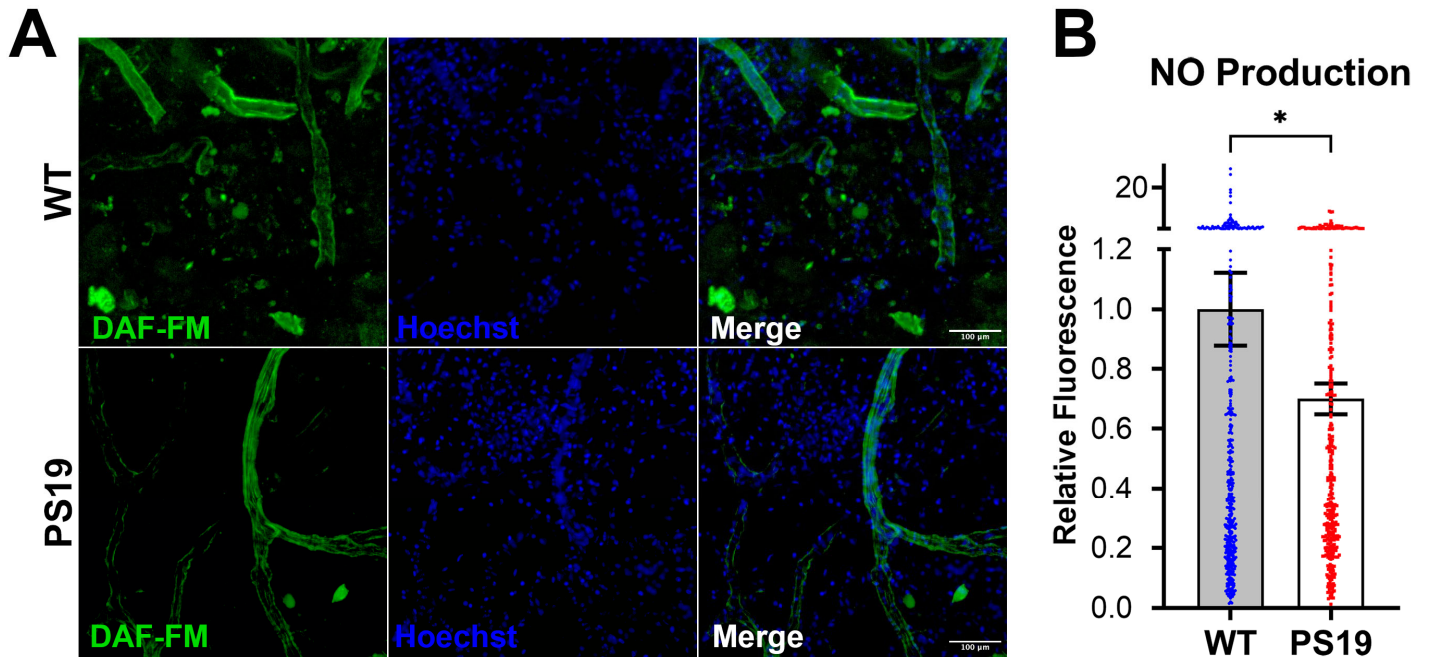

**Supplementary Figure 3. Decreased nitric oxide production in microvessels isolated from P301S(PS19)**

**mice. A,** Brain microvessels isolated from three individual male and female 9-month-old WT and three individual 9-month-old P301S(PS19) mice incubated with DAF-FM, a nitric oxide indicator (green), and Hoechst 33342, a nuclear stain (blue). Scale bar is 100  $\mu$ m. **B,** Quantification of DAF-FM fluorescence normalized to vessel area and diameter for all microvessels from each animal. Unpaired, two-sided Student's t test with Welch's correction ( $t(580.9)=2.265$ , \*,  $P=0.024$ . WT,  $n=436$ ; PS19,  $n=372$  individual vessel segments obtained from 3 WT and 3 PS19 mice, examined in 2 independent experiments). Data are representative images and means  $\pm$  SEM.

## Vascular Smooth Muscle Relaxation

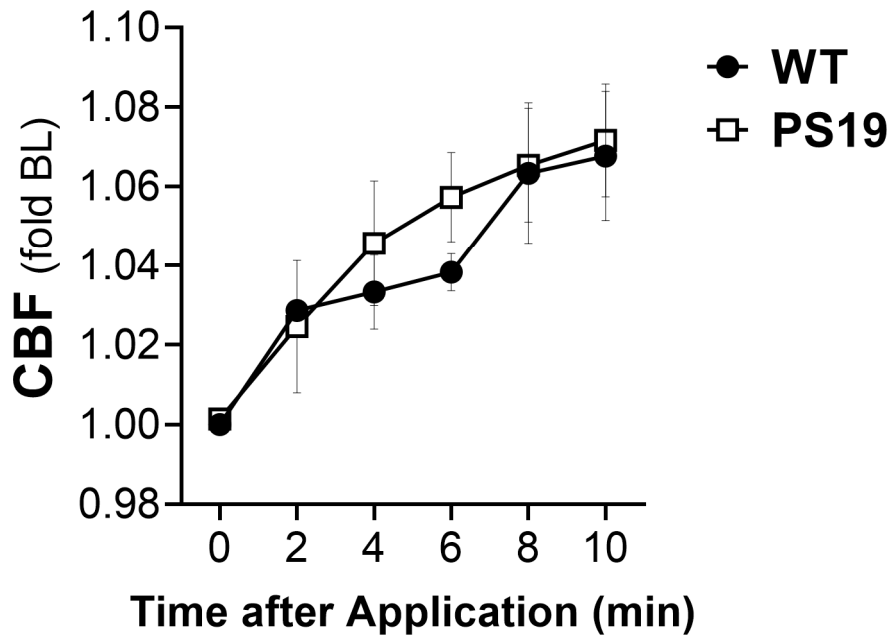

### Supplementary Figure 4. Vascular smooth muscle function is unimpaired in male and female

**P301S(PS19) mice.** Cerebral blood flow (CBF) responses in P301S(PS19) mice compared to wildtype (WT) littermates at 8-10 months of age of both sexes. Application of 20  $\mu$ M sodium nitroprusside, a nitric oxide donor that acts on vascular smooth muscle to cause vasodilation, significantly increased cerebral blood flow in both WT and P301S(PS19) mice ( $F(1.863, 9.315)=14.72$ , RM ANOVA,  $P=0.0015$ ). No significant differences in vascular smooth muscle function were found between WT and PS19 groups ( $F(1,4)=0.2724$ , RM ANOVA,  $P=0.6293$ . WT,  $n=3$ ; PS19,  $n=3$  mice). Data are means  $\pm$  SEM.

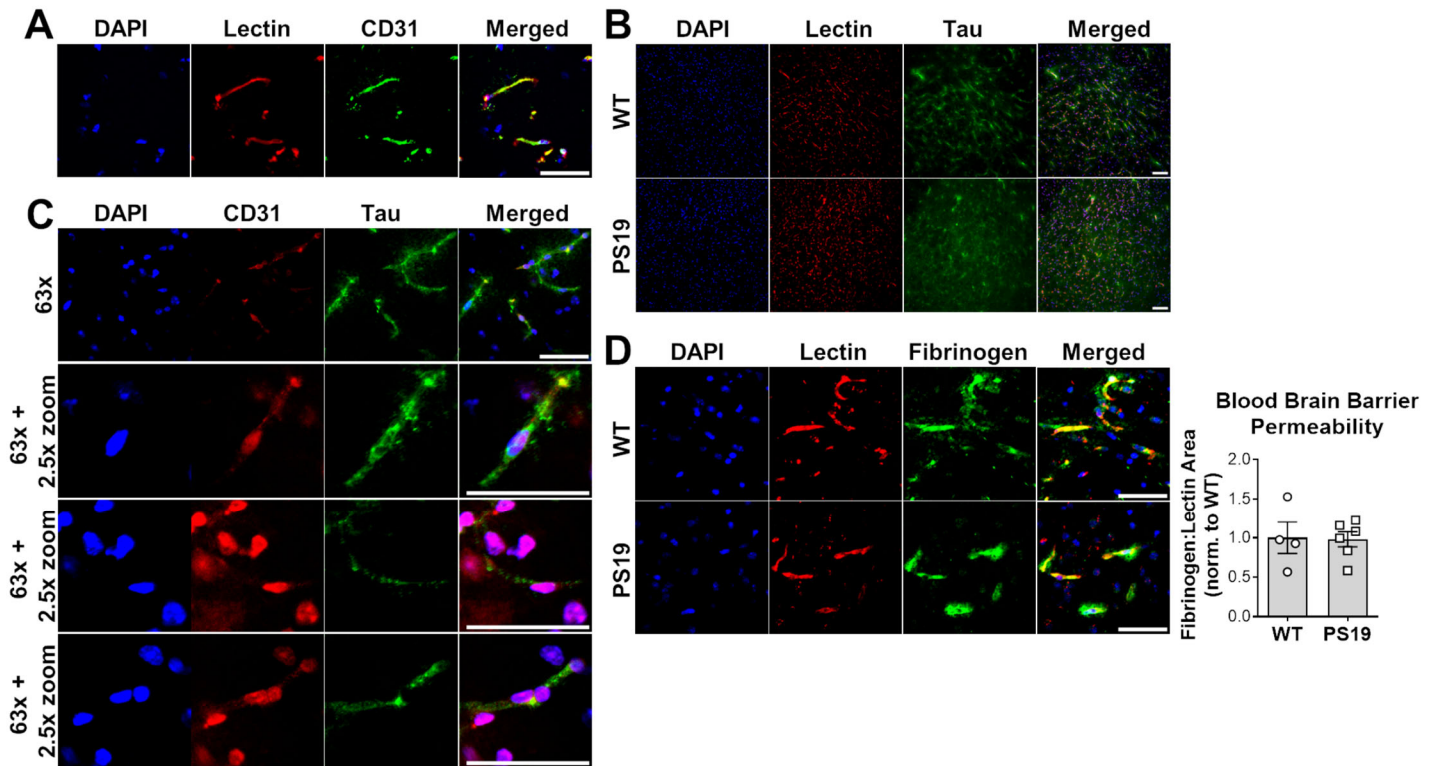

**Supplementary Figure 5. Eight-month-old male and female P301S(PS19) mice display tau**

**immunoreactivity in brain microvasculature without changes in blood brain barrier permeability. A,**

Representative images (63X) of P301S(PS19) cortical brain sections shows that lectin (red) stains endothelial cells of the brain microvasculature only as shown by its exclusive colocalization with CD31 (green)

immunoreactivity with DAPI (blue). Scale bar is 50  $\mu$ m. **B,** Representative low-magnification images (10X) of cortical brain sections showing total tau (Tau5, green) immunoreactivity in P301S(PS19) and WT brain microvasculature (lectin, red) at 8 months of age.

**C,** Representative high-magnification images (63X and 63X+2.5X digital zoom) of cortical brain sections showing total tau total tau (Tau5, green) immunoreactivity in P301S(PS19) brain endothelial cells (CD31, red)) at 8 months of age. Scale bar is 50  $\mu$ m. **D,** Representative images (63X) of brain microvasculature (lectin, red) and fibrinogen (green) cortical brain sections of P301S(PS19) and WT at 8 months of age. Scale bar is 50  $\mu$ m.

**E,** Quantification of ratio of fibrinogen area to lectin area as a measure of blood brain barrier permeability. No significant differences in blood brain barrier permeability were observed between WT and P301S(PS19) mice (unpaired, two-sided, Student's t test,

$t(4.422)=0.09254$ ,  $P=0.9303$ . WT,  $n=4$ ; PS19,  $n=6$  mice). Data are means  $\pm$  SEM.



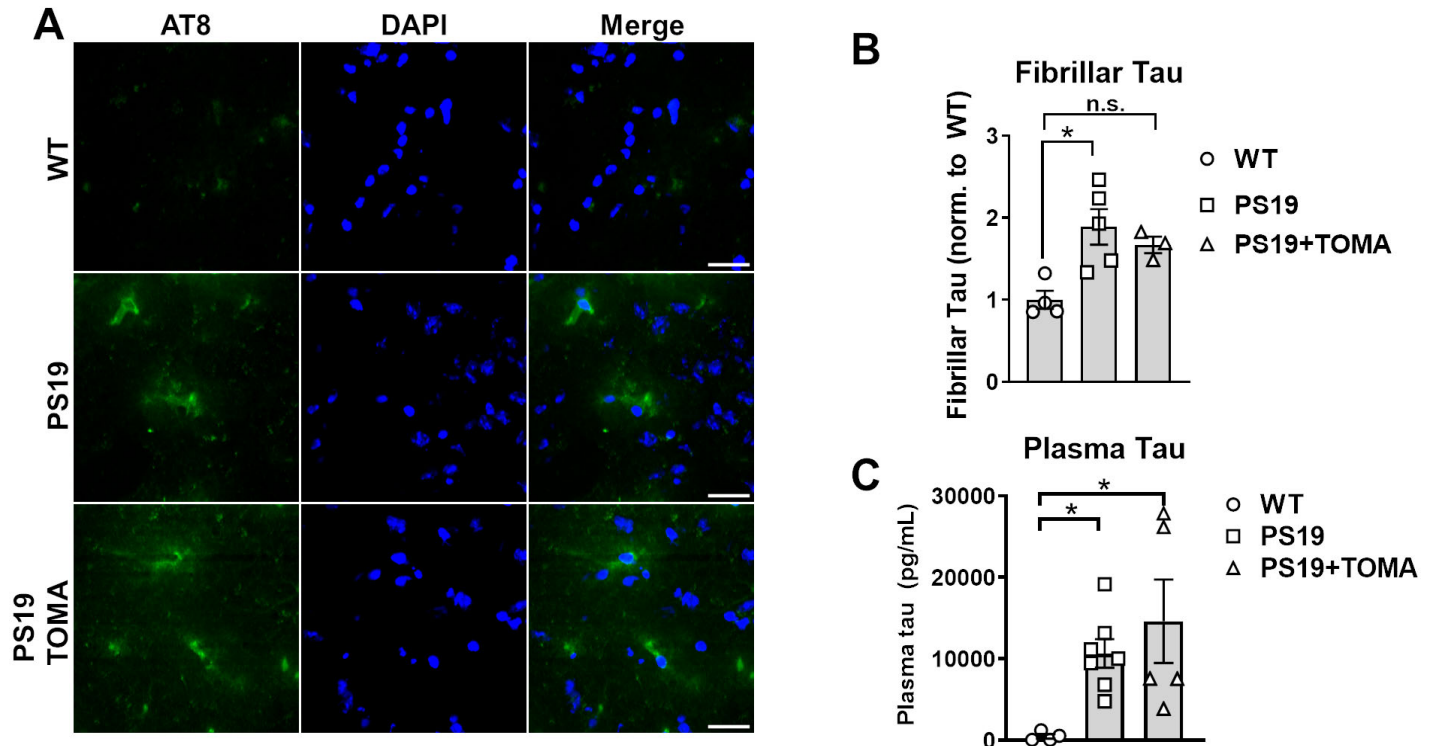

**Supplementary Figure 6. Treatment with tau oligomer-specific monoclonal antibody (TOMA) does not reduce cortical brain fibrillar tau or total plasma tau in 12-month-old male and female P301S(PS19) mice.** **A**, Representative images (63X) of cortical brain sections showing fibrillar tau immunoreactivity (phospho-tau, AT8, green) with DAPI (blue) in 12-month-old WT or P301S(PS19) male and female mice treated with tau oligomer-specific monoclonal antibody (TOMA) or same isotype IgG. Scale bar is 50  $\mu$ m. **B**, Quantitative analysis of immunofluorescence data in **A** show a significant increase in fibrillar tau (AT8) in P301S(PS19) mice as compared to WT controls that is not reduced by TOMA ( $F(2, 9) = 7.223$ , ANOVA, \*,  $P < 0.05$  by Tukey's. WT,  $n=4$ ; PS19,  $n=5$ ; PS19+TOMA,  $n=3$  mice). **C**, Plasma levels of tau are significantly increased in P301S(PS19) mice as compared to WT controls at 12 months that is not significantly affected by TOMA ( $H=8.474$ , Kruskal-Wallis,  $P=0.0067$ ; WT vs PS19, \*,  $P < 0.05$ ; WT vs. PS19+TOMA, \*,  $P < 0.05$  by Dunn's. n.s. indicates  $p=0.07$  by Dunn's. WT,  $n=4$ ; PS19,  $n=8$ ; PS19+TOMA,  $n=5$ ). Data are means  $\pm$  SEM. For post-hoc analyses, a lack of a specific P value in the legend reflects the information reported by GraphPad Prism Version 9.4.0.
